# Supplementary material for: Precision cancer therapy: profiting from tumor specific defects in the DNA damage tolerance system
Source: PubMed Central journal article supplement (PMC5922359; doi:10.18632/oncotarget.24777), 2018-04-10
Supplement: oncotarget-09-18832-s001.pdf [file oncotarget-09-18832-s001.pdf]

## Precision cancer therapy: profiting from tumor specific defects in the DNA damage tolerance system

### SUPPLEMENTARY MATERIALS

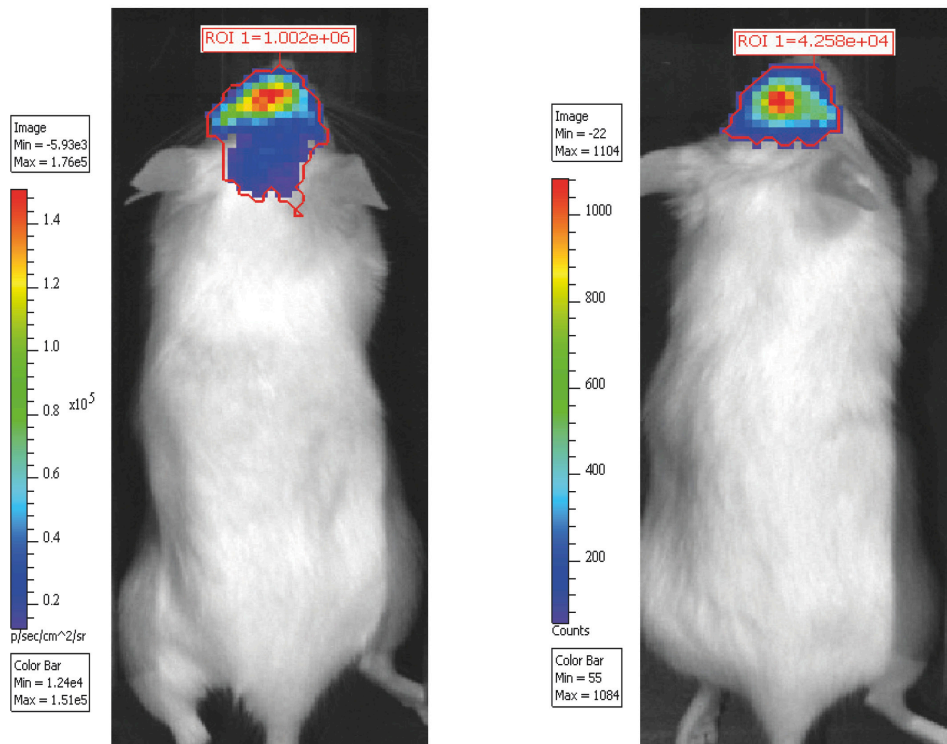

**Supplementary Figure 1:** (A) Representative IVIS images of CsPt treated mice carrying a DDTD tumor. Brain tumor developed after consecutive CsPt treatments.

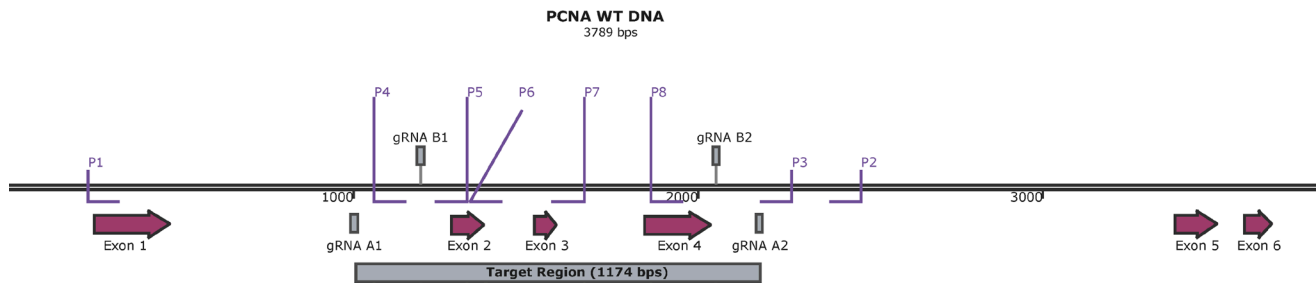

**Supplementary Figure 2:** (A) Targeting strategy of endogenous PCNA WT allele. Two pairs of CRISPR/Cas9 gRNA (A1 + 2 and B1 + 2), targeting the indicated regions, have been used to delete the PCNA alleles in the invasive lobular breast carcinoma cells. The primers used to screen for deletion have been described in Supplementary Table 2–3 and are indicated in the map as P1–P8.

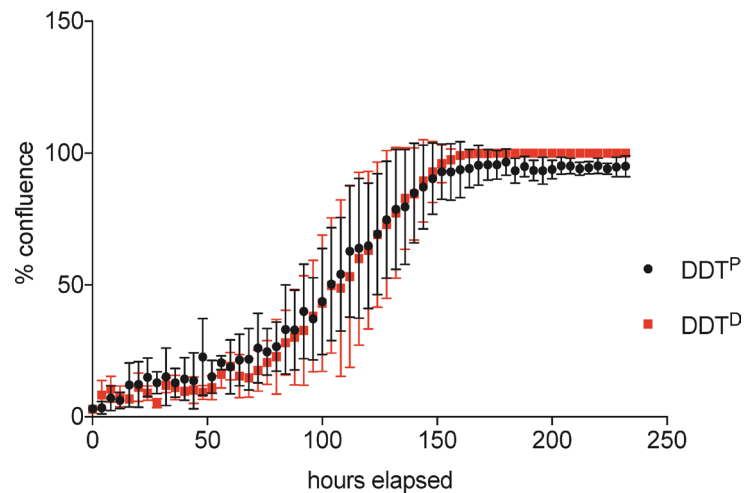

**Supplementary Figure 3:** (A) The graph displays the cell confluence in percentage (%) of DDT<sup>P</sup> and DDT<sup>D</sup> breast tumor cells measured using IncuCyte® live-cell imaging. Using 96 well plates, each cell line was seeded in quadruple at a density of 300 cells per well and proliferation was measured on the basis of cell density (IncuCyte®).

**Supplementary Table 1: PCR primers to assess the deletion of the floxed PCNA allele**

|         |                         |
|---------|-------------------------|
| Forward | CCTGAGAGAGTTTGCCTGCAGG  |
| Reverse | CTTTTGCTCACTTGCCAACCCTC |

**Supplementary Table 2A: Sequences of gRNA's used to target the endogenous PCNA allele**

| <b>gRNA</b> | <b>(5'....3')</b>    |
|-------------|----------------------|
| gRNA-A1     | GAAAAGGCCAGACGTGATG  |
| gRNA-A2     | GACTCCATAAGCTTTTAC   |
| gRNA-B 1    | ACCGTGAGTGTGAAATGGTA |
| gRNA-B 2    | TAGTAAGGGGGCGTCCAGTT |

**Supplementary Table 2B: Sequences of primers used to screen for deletion**

| <b>Primers</b> | <b>(5'....3')</b>           |
|----------------|-----------------------------|
| P1             | GTCGCCACAACCTCCGCCACC       |
| P2             | GCTGAGAATCTTCCTGCTGTAGC     |
| P3             | GAGGGTTGGCAAGTGAGCAAAAAG    |
| P4             | GATGCTTTCTCGAATGTTGGCTTTTAG |
| P5             | GTAATGATGTCTTCATTACCAGCAC   |
| P6             | GGGCTGAAGATAATGCAGACACC     |
| P7             | CACCACTCCACTCAGAACACGCA     |
| P8             | CTTTTGCTCACTTGCCAACCCTC     |
| P9*            | TTCGCCACCTCTGACTTGAGCGT     |

\*was used to sequence the pX333 for checking the insertion of gRNAs.

**Supplementary Table 3: PCR product sizes of the indicated primer pairs**

| <b>External Primers</b> | <b>WT</b> | <b>Deletion</b>  |
|-------------------------|-----------|------------------|
| P1 + P2                 | 2247 Bps  | 1073 Bps         |
| P1 + P3                 | 2046 Bps  | 872 Bps          |
| <b>Internal Primers</b> | <b>WT</b> | <b>Deleted</b>   |
| P4 + P5                 | 260 Bps   | No Amplification |
| P6 + P7                 | 334 Bps   | No Amplification |
| P8 + P3                 | 406 Bps   | No Amplification |
